# Supplementary material
Source: publisher figshare collection journal article supplement (https://acs.figshare.com/ndownloader/files/4762543)

# Efficient *trans*-Selectivity in the Cyclocondensation of (*S*)-2-[2-(*p*-Tolylsulfinyl)phenyl]acetaldehyde with Activated Dienes Catalyzed by Yb(OTf)<sub>3</sub>.

*José L. García Ruano,\* M. Ángeles Fernández-Ibáñez, M. Carmen Maestro.\**

Departamento de Química Orgánica, Universidad Autónoma de Madrid, Cantoblanco,

28049-Madrid, SPAIN.

[jose Luis.garcia.ruano@uam.es](mailto:jose Luis.garcia.ruano@uam.es); [carmen.maestro@uam.es](mailto:carmen.maestro@uam.es)

## Supporting Information

### Table of Contents

- S1** Table of contents
- S2** General Experimental Methods. Data of compounds **12** and **13**
- S3** Data of compounds **14**, **15**, **16** and **17**.
- S4** Data of compounds **18** and **19**.
- S5** <sup>1</sup>H NMR and <sup>13</sup>C NMR spectrum of compound **2**.
- S6** <sup>1</sup>H NMR spectrum of the mixture of **2**+**3** and <sup>1</sup>H NMR spectrum of **6**.
- S7** <sup>13</sup>C NMR spectrum of **6** and <sup>1</sup>H NMR of the mixture of **6**+**7**.
- S8** <sup>1</sup>H NMR and <sup>13</sup>C NMR spectrum of compound **9**.
- S9** <sup>1</sup>H NMR spectrum of the mixtures **9** + **10** and <sup>1</sup>H NMR spectrum of **12** + **13**
- S10** <sup>1</sup>H NMR spectrum of the mixtures of **14** + **15** and <sup>1</sup>H NMR spectrum of **16** + **17**.
- S11** <sup>1</sup>H NMR spectrum of the mixture of **18** + **19** and <sup>1</sup>H NMR spectrum of **20**.
- S12** <sup>13</sup>C NMR spectrum of compound **20** and <sup>1</sup>H NMR spectrum of **20** + **21**.
- S13** <sup>1</sup>H NMR and <sup>13</sup>C NMR spectrum of compound **22**.
- S14** <sup>1</sup>H NMR and <sup>13</sup>C NMR spectrum of compound **23**
- S15** X ray structures of compounds **2** and **9**.
- S16** <sup>1</sup>H NMR data used for configurational assignment of compound **20**
- S17** <sup>1</sup>H NMR data used for configurational assignment of compound **22**

### General Experimental Methods

Unless stated otherwise, NMR spectra were recorded in CDCl<sub>3</sub> solutions at 300 and 75 MHz for <sup>1</sup>H and <sup>13</sup>C NMR, respectively (*J* values are given in hertz). Melting points were measured in open capillary tubes and are uncorrected. Mass spectra (MS) were determined by FAB<sup>+</sup> (fast atom bombardment), ES<sup>+</sup> (electrospray; MeOH + 0.1 formic acid) or EI<sup>+</sup> (electron impact; 70 eV). De's were evaluated by integration of well-separated signals of the NMR spectra or by chiral HPLC (retention times in minutes). HDA reactions were carried out under argon atmosphere in anhydrous solvents. CH<sub>2</sub>Cl<sub>2</sub> was distilled from P<sub>2</sub>O<sub>5</sub>. Flash-column chromatography was performed using silica gel (230-400 mesh). Dienes **5**, **8** and **11** were synthesized according literature procedures.<sup>1</sup>

#### *Mukaiyama adducts from 1 and Danishefsky's diene:*

A 88:12 mixture of **12** and **13** was obtained from Danishefsky's diene following the general procedure at -40 °C for 5 min, when the reaction was quenched with water. The residue was purified by flash chromatography (ethyl acetate-hexane, 3:1). Combined yield 72%. White solid. They could not be isolated and were characterized from the above mixture. <sup>1</sup>H-NMR: 7.82 [m, 1H (**12**) + 1H (**13**)], 7.59-7.22 [m, 8H (**12**) + 8H (**13**)], 5.57 [d, *J* 13.3 Hz, 1H (**13**)], 5.52 [d, *J* 12.9 Hz, 1H (**12**)], 4.26 [m, 1H (**12**) + 1H (**13**)], 3.70 [s, 3H (**12**) + 3H (**13**)], 3.00 [dd, *J* 14.0 and 6.5 Hz, 1H (**12**) + 1H (**13**)], 2.91 [dd, *J* 14.5 and 5.9 Hz, 1H (**12**) + 1H (**13**)], 2.60 [dd, *J* 16.7 and 3.8 Hz, 1H (**12**) + 1H (**13**)], 2.48 [dd, *J* 16.7 and 8.1 Hz, 1H (**12**) + 1H (**13**)], 2.35 [s, 3H (**12**) + 3H (**13**)]. MS

---

<sup>1</sup> (a) Mikami, K.; Matsumoto, S.; Okubo, Y.; Fujitsuka, M.; Ito, O.; Suenobu, T.; Fukuzumi, S. *J. Am. Chem. Soc.* **2000**, *122*, 2236. (b) Danishefsky, S.; Yan, C.-F.; Singh, R. K.; Gammill, R. B.; McCurry, P. M.; Fritsch, N.; Clardy, J. *J. Am. Chem. Soc.* **1979**, *101*, 7001.

(EI<sup>+</sup>) *m/z*: 357 [M-1] (0.2), 341 (1), 327 (7), 326 (6), 309 (61), 214 (90), 113 (100), 91 (50). HRMS (EI<sup>+</sup>) [M-17]: calcd for C<sub>20</sub>H<sub>21</sub>O<sub>3</sub>S: 341.1211; found: 341.1200.

*Mukaiyama adducts from 1 and diene 8:*

A 90:10 mixture of **14** and **15** was obtained from diene **8** at -40 °C for 3 h, following the general procedure in the presence of MS 4Å, when the reaction was quenched with water. The residue was purified by flash column chromatography (ethyl acetate-hexane, 1:1) to afford a mixture of diastereoisomers **14** and **15** as a (Combined yield: 51%). White solid. They were characterized from the corresponding mixture. <sup>1</sup>H-NMR (200 MHz): 7.76 [m, 1H (**14**) + 1H (**15**)], 7.46-7.33 [m, 4H (**14**) + 4H (**15**)], 7.27-7.21 [m, 4H (**14**) + 4H (**15**)], 3.89-3.86 [m, 1H (**14**) + 1H (**15**)], 3.87 [s, 3H (**14**)], 3.86 [s, 3H (**15**)], 3.04-2.80 [m, 3H (**14**) + 3H (**15**)], 2.35 [s, 3H (**14**) + 3H (**15**)], 1.69 [s, 3H (**14**)], 1.67 [s, 3H (**15**)], 1.22 [d, *J* 7.5 Hz, 3H (**14**)], 1.18 [d, *J* 7.0 Hz, 3H (**15**)]. MS (EI<sup>+</sup>) *m/z*: 385 (0.6) [M-1], 354 (9), 337 (80), 253 (27), 241 (44), 211 (100), 141 (46), 91 (46). HRMS (EI<sup>+</sup>) [M-1]: calcd for C<sub>22</sub>H<sub>25</sub>O<sub>4</sub>S: 385.1474; found: 385.1466.

*Sulfinyl group oxidation of HDA adducts 9 and 10 :*

To a 60:40 mixture of diastereoisomers **9** and **10** (17 mg, 0.05 mmol) respectively in CH<sub>2</sub>Cl<sub>2</sub> (1 mL), cooled at 0 °C was added a solution of *m*-CPBA (17 mg 0.1 mmol) in CH<sub>2</sub>Cl<sub>2</sub> (0.5 mL). The reaction mixture was stirred for 1 h, starting from 0 °C to room temperature. Then, the mixture was treated with saturated aqueous Na<sub>2</sub>SO<sub>3</sub> (2 mL). The organic layer was separated, washed with saturated aqueous NaHCO<sub>3</sub> (2 mL), dried (Na<sub>2</sub>SO<sub>4</sub>), and the solvent was removed under reduced pressure. The resulting 60:40 mixture of sulfones **16** and **17** was characterized without further purification. <sup>1</sup>H-NMR (200 MHz): 8.18-7.11 [m, 1H (**16**) + 1H (**17**)], 7.69 and 7.29 [sistema AA'BB', 4H (**16**) + 4H (**17**)], 7.57-7.36 [m, 3H (**16**) + 3H (**17**)], 7.06 [s, 1H (**16**)], 7.01 [s, 1H, (**16**)], 4.35-4.24 [m, 1H (**16**) + 1H (**17**)], 3.39 [dd, *J* 14.5 and 2.7 Hz, 1H, (**16**)], 3.21 [dd, *J* 14.5 and

3.2 Hz, 1H (**17**)], 3.12-2.94 [m, 1H (**16**) + 1H (**17**)], 2.46-2.34 [m, 1H (**16**) + 1H (**17**)], 2.39 [s, 3H (**16**) + 3H (**17**)], 1.62 [s, 3H (**16**)], 1.60 [s, 3H (**17**)], 1.22 [d, *J* 7.0 Hz, 3H (**16**)], 1.11 [d, *J* 7.5 Hz, 3H (**17**)]. HRMS (ES<sup>+</sup>) [M+1]: calcd for C<sub>21</sub>H<sub>23</sub>O<sub>4</sub>S: 371.1311; found: 371.1320.

*Hydroxy group oxidation of Mukaiyama adducts 14 and 15:*

A mixture of PCC (11 mg, 0.05 mmol) and Celite (10 mg) was added, at room temperature, to a 90:10 mixture of **14** and **15** (10 mg, 0.03 mmol), in CH<sub>2</sub>Cl<sub>2</sub> (1 mL). The mixture was stirred for 3 h at the same temperature and then filtered through Celite. The solvent was removed under vacuum. The residue was purified by flash column chromatography (ethyl acetate-hexane, 1:1) to yield a 82:18 mixture of **18** and **19** as a white solid (combined yield 31%). <sup>1</sup>H-NMR (200 MHz): 7.88-7.85 [m, 1H (**18**) + 1H (**19**)], 7.72-7.64 [m, 1H (**18**) + 1H (**19**)], 7.57-7.34 [m, 3H (**18**) + 3H (**19**)], 7.27-7.10 [m, 3H (**18**) + 3H (**19**)], 6.19 [s, 1H (**18** or **19**)], 6.16 [s, 1H (**19** or **18**)], 4.18-3.78 [m, 3H (**18**) + 3H (**19**)], 3.89 [s, 3H (**19**)], 3.86 [s, 3H (**18**)], 2.37 [s, 3H (**18**) + 3H (**19**)], 1.73 [s, 3H], 1.70 [s, 3H], 1.35 [d, *J* 7.0 Hz, 3H (**18**)], 1.34 [d, *J* 7.0 Hz, 3H].

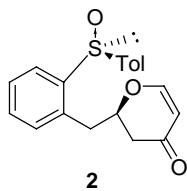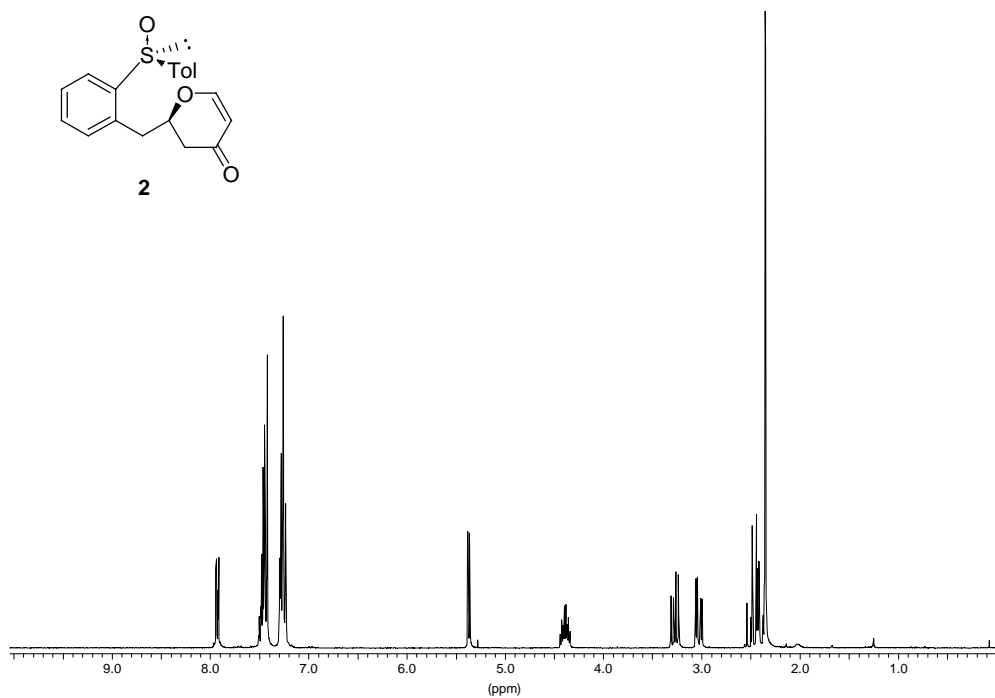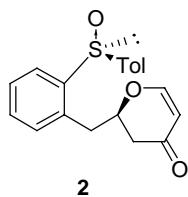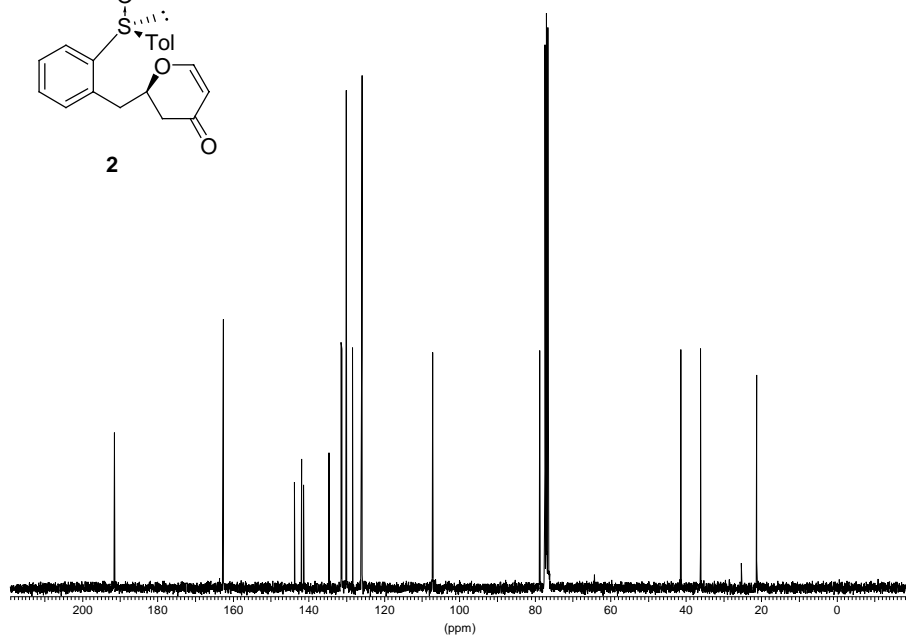

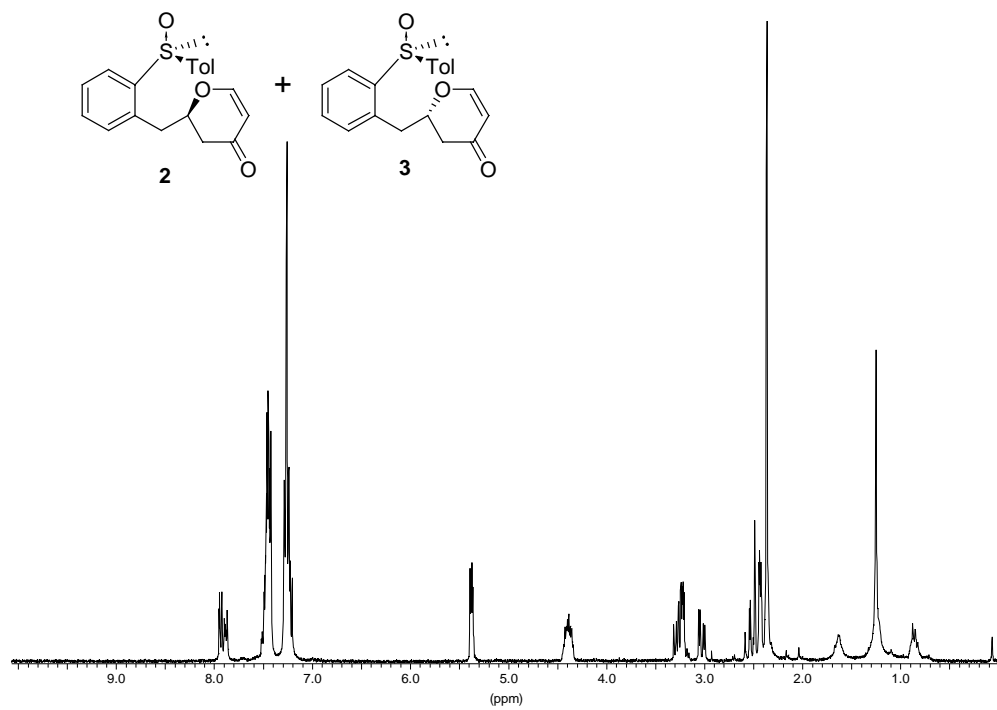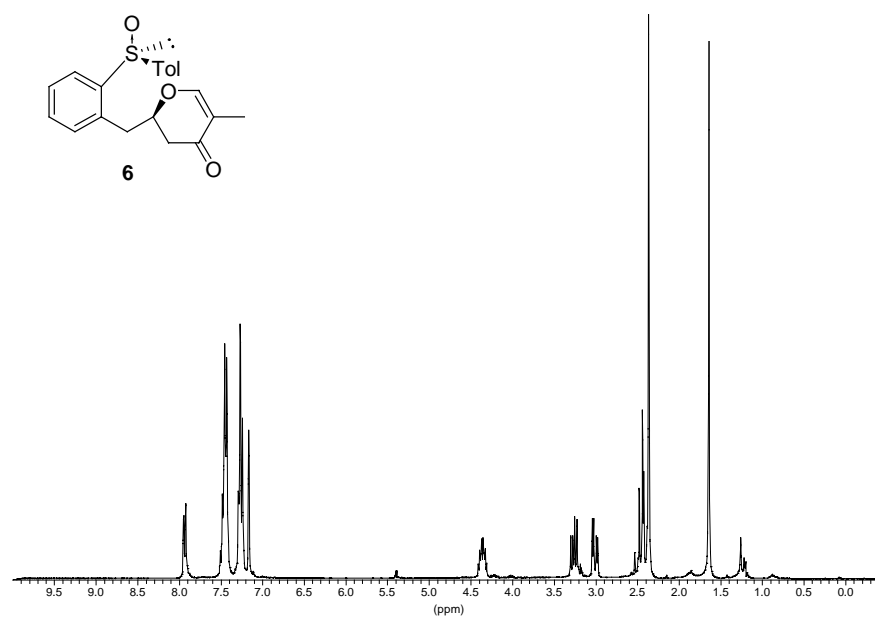

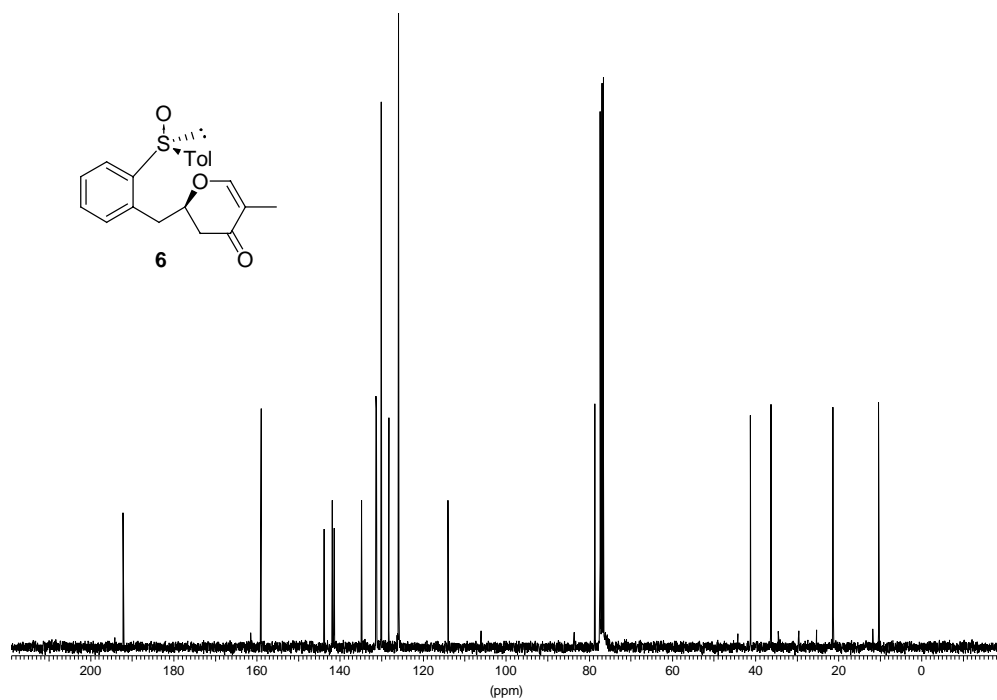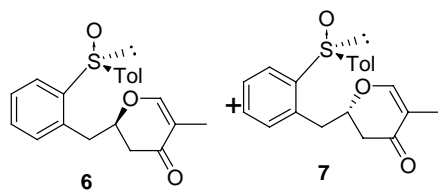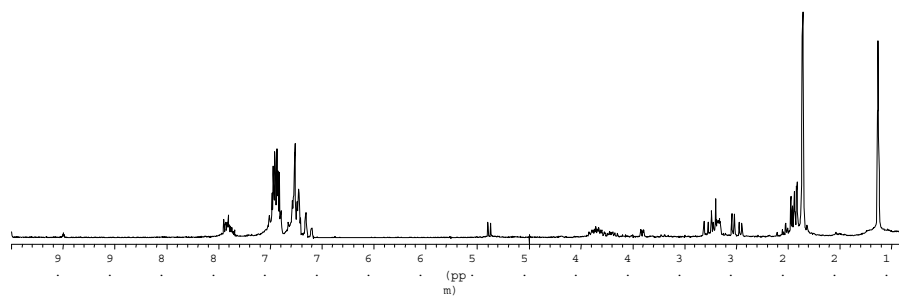

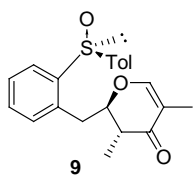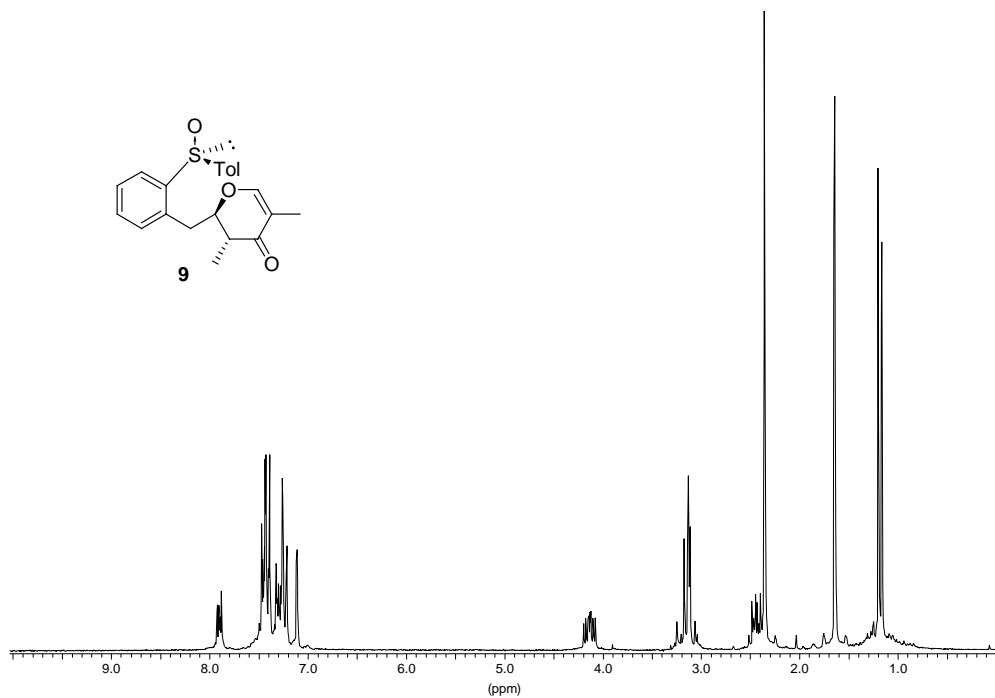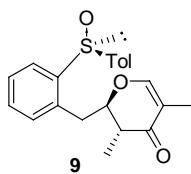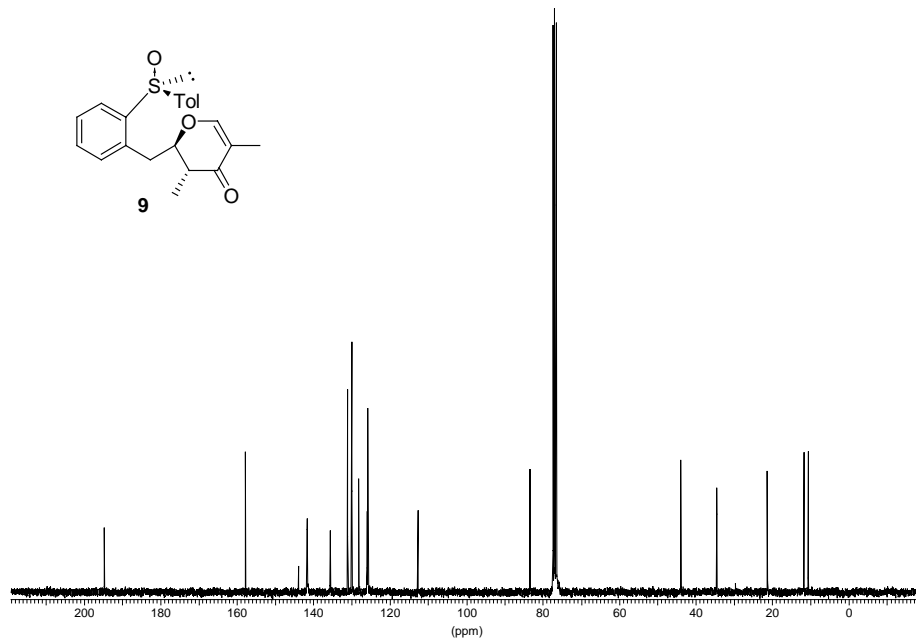



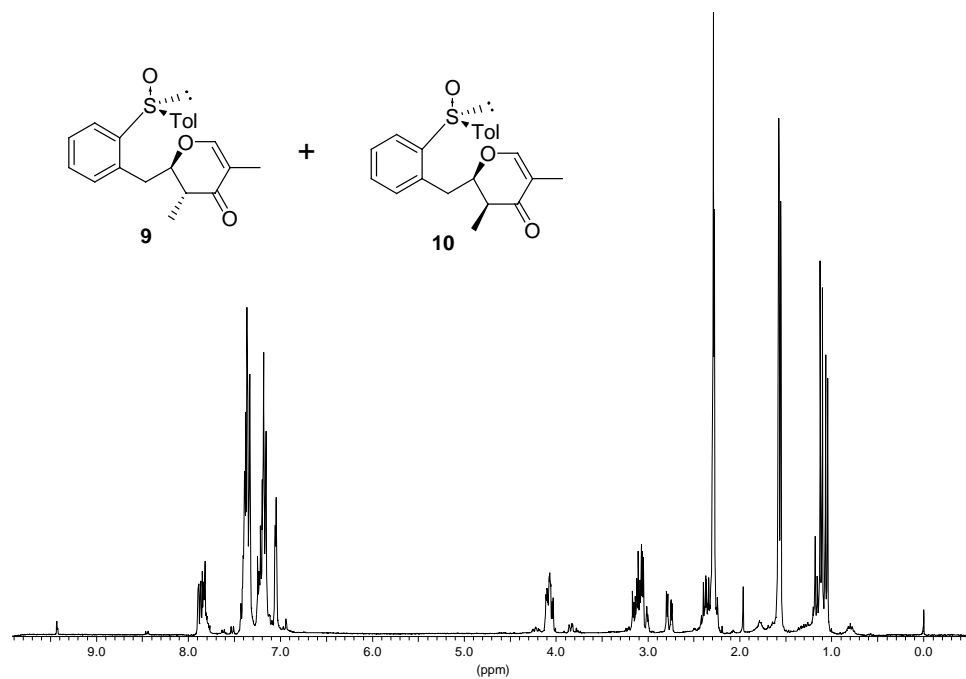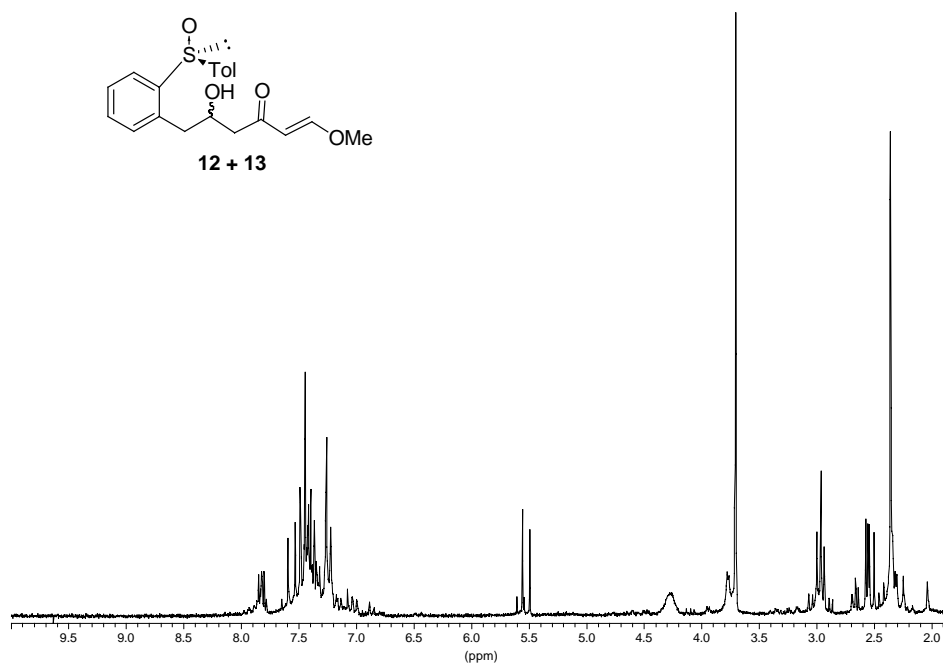

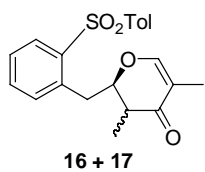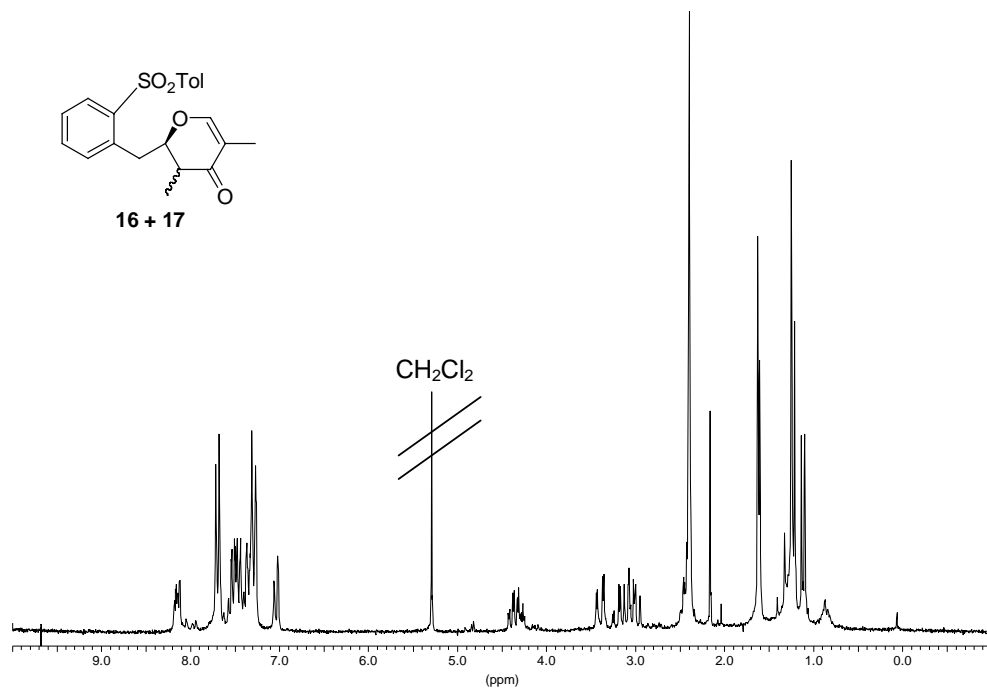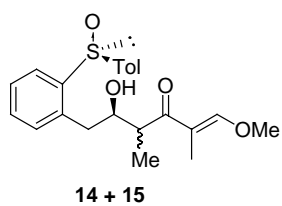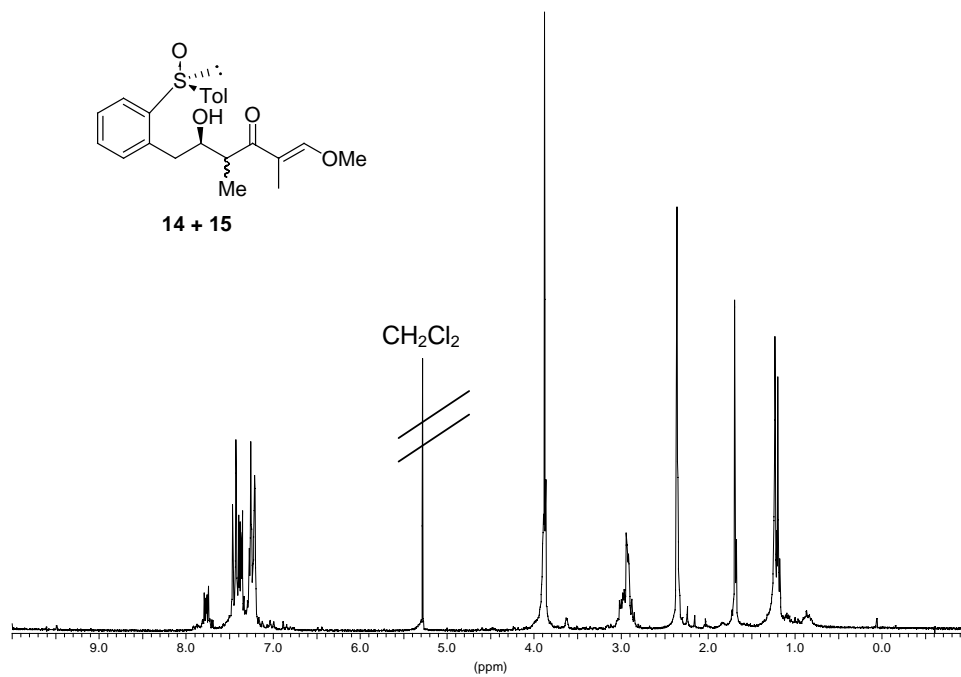

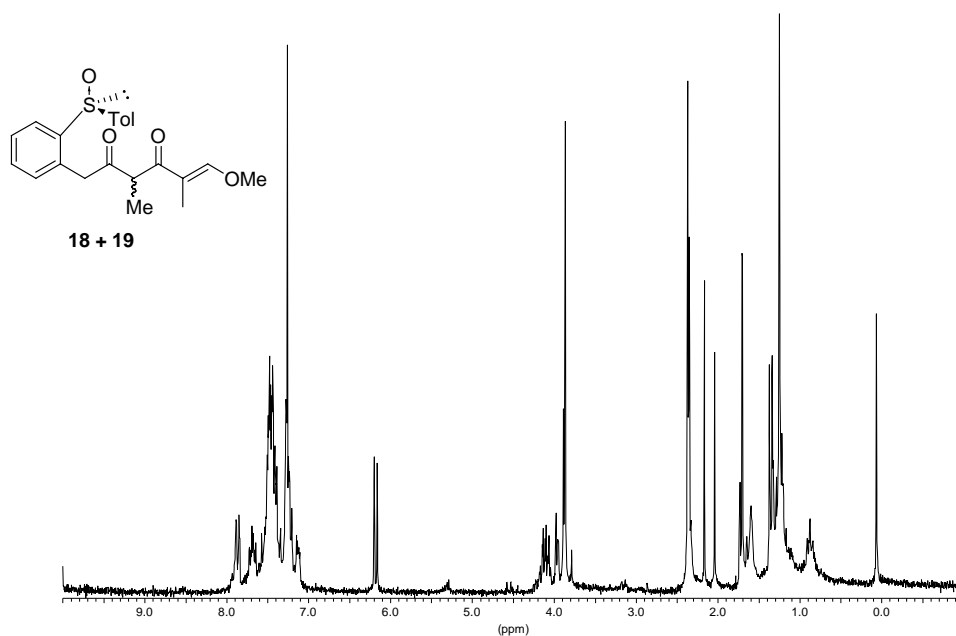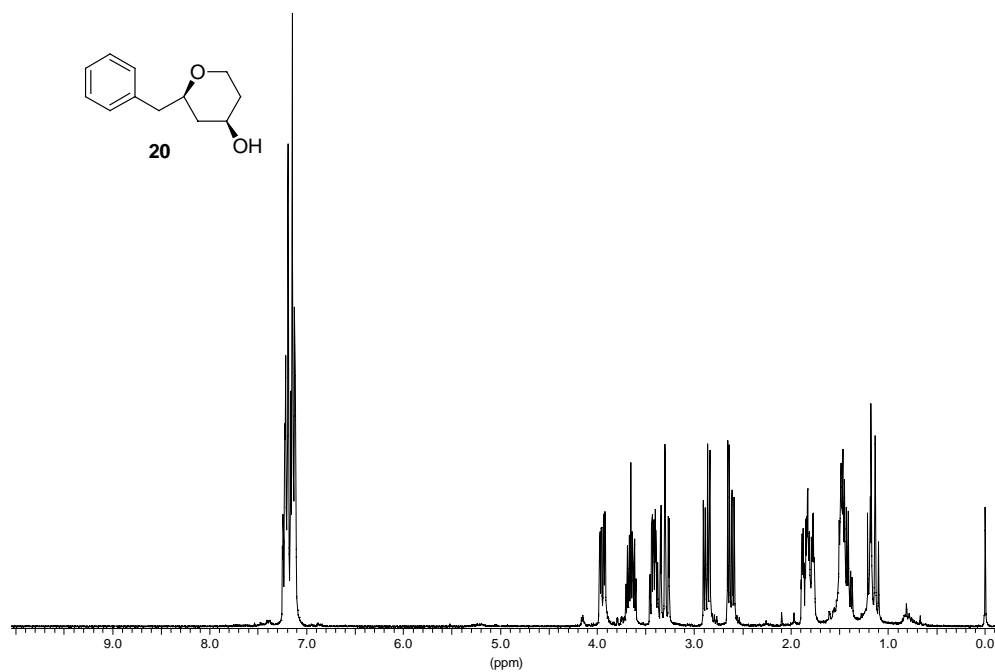

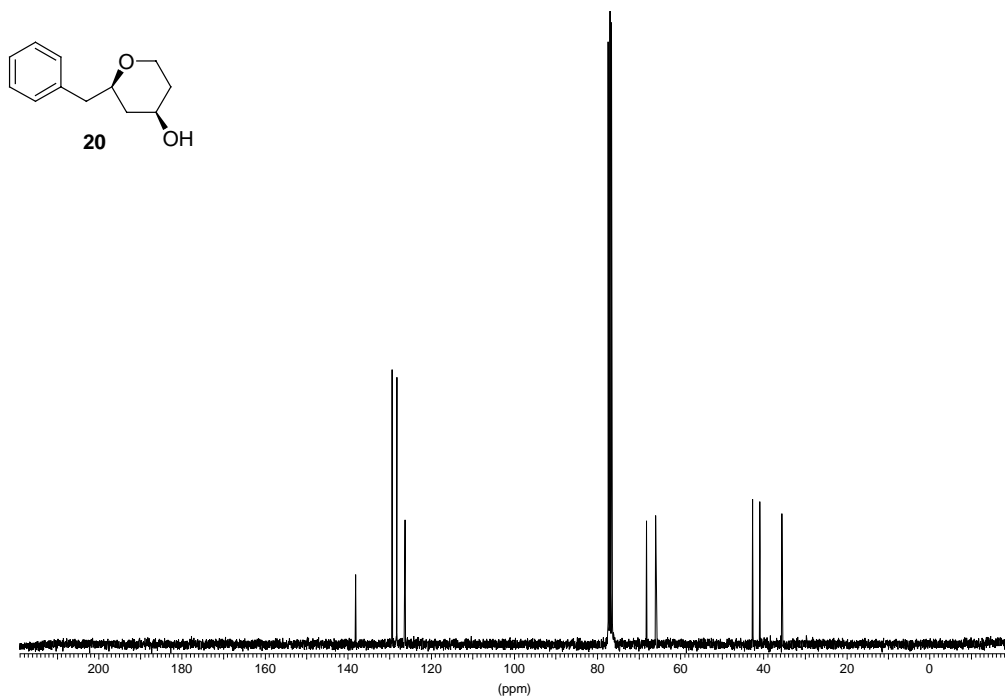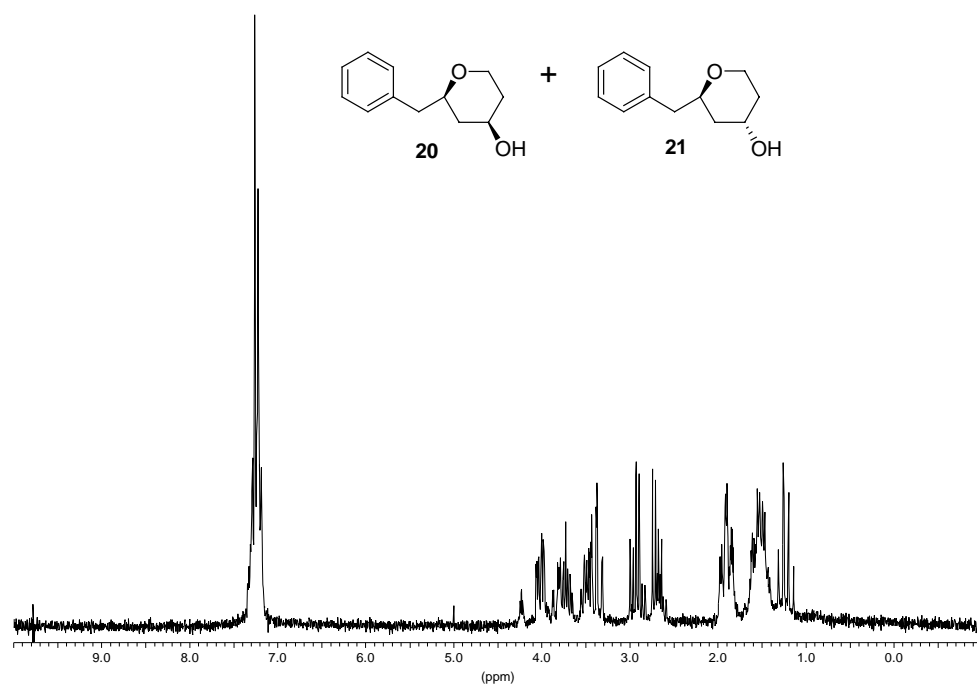

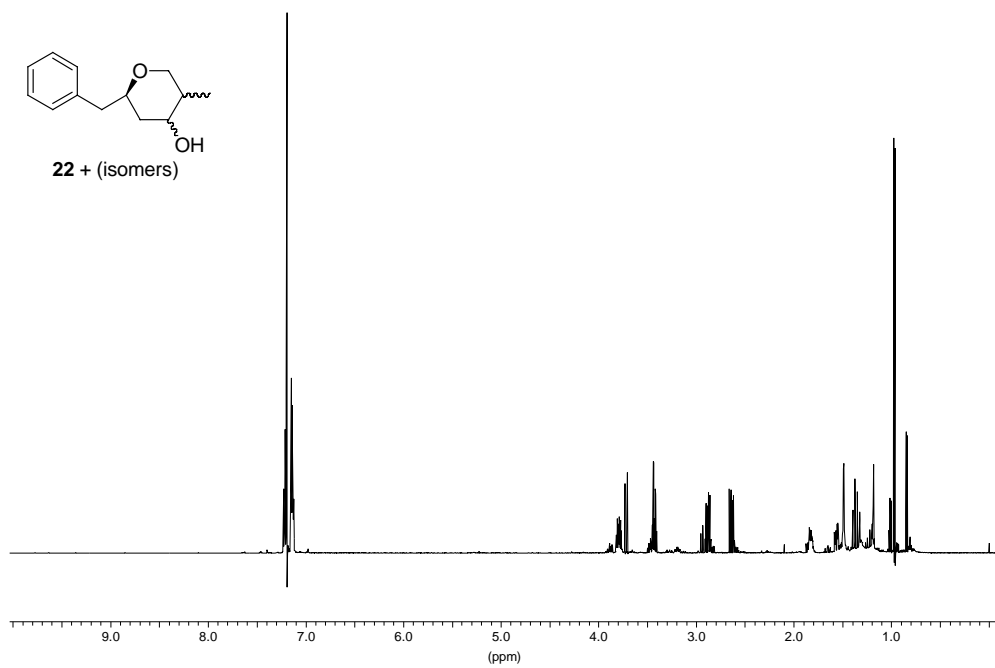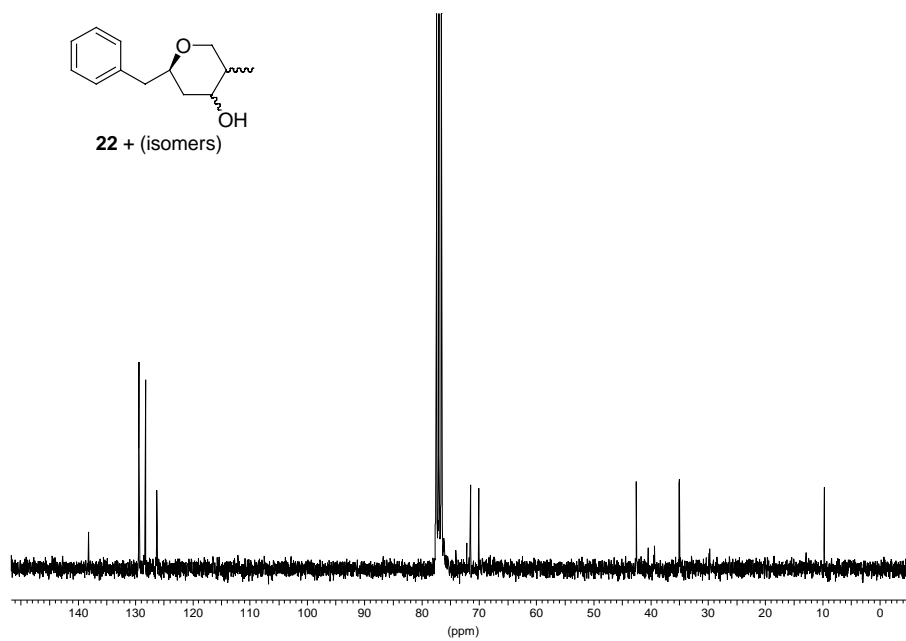

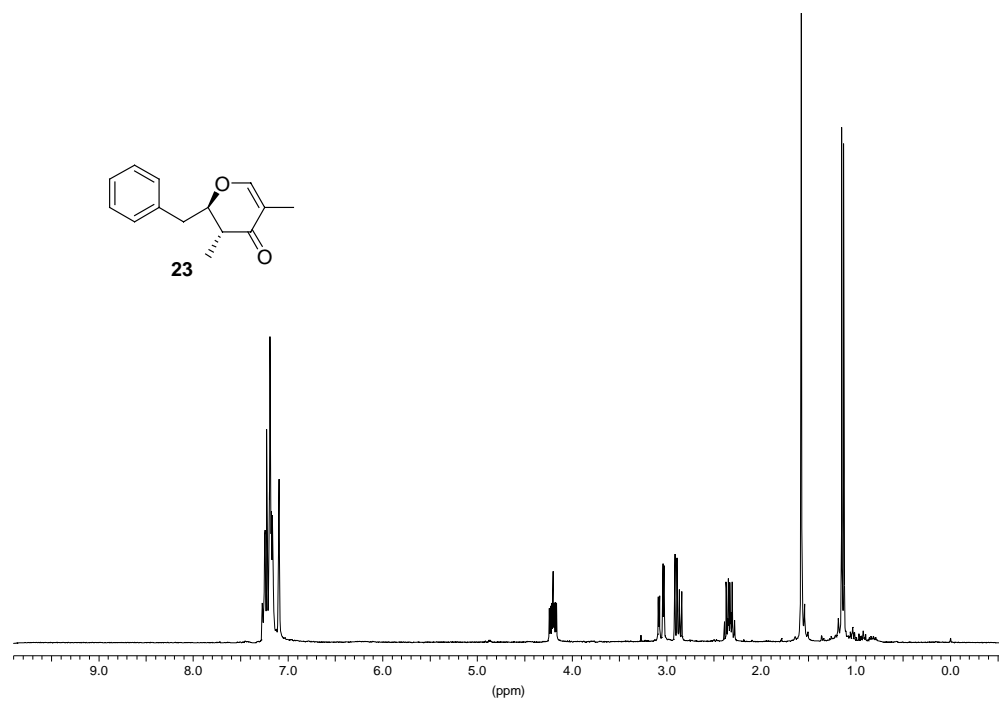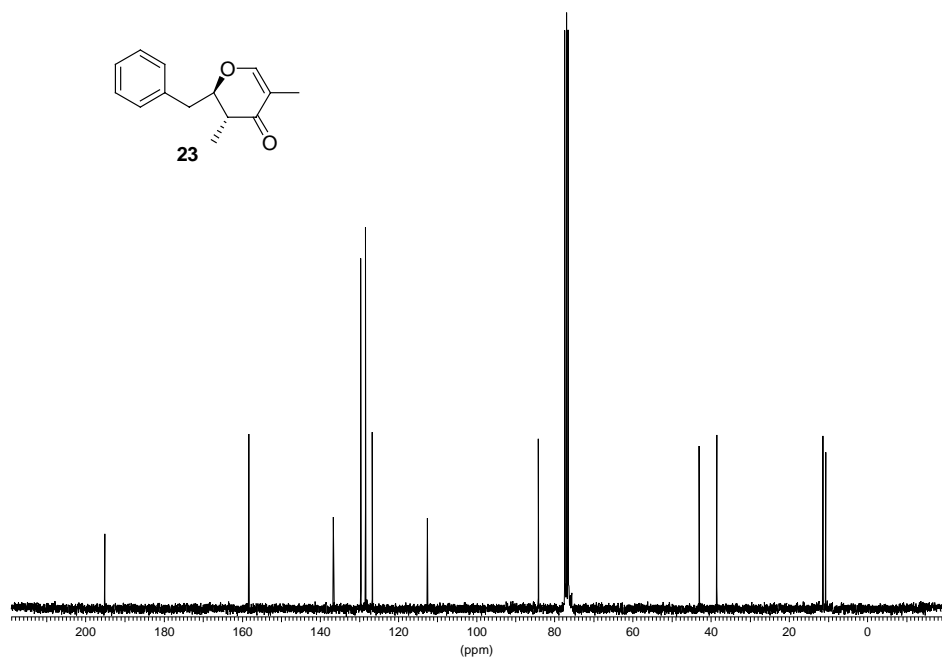

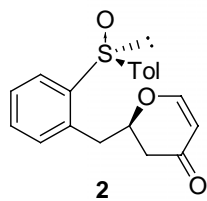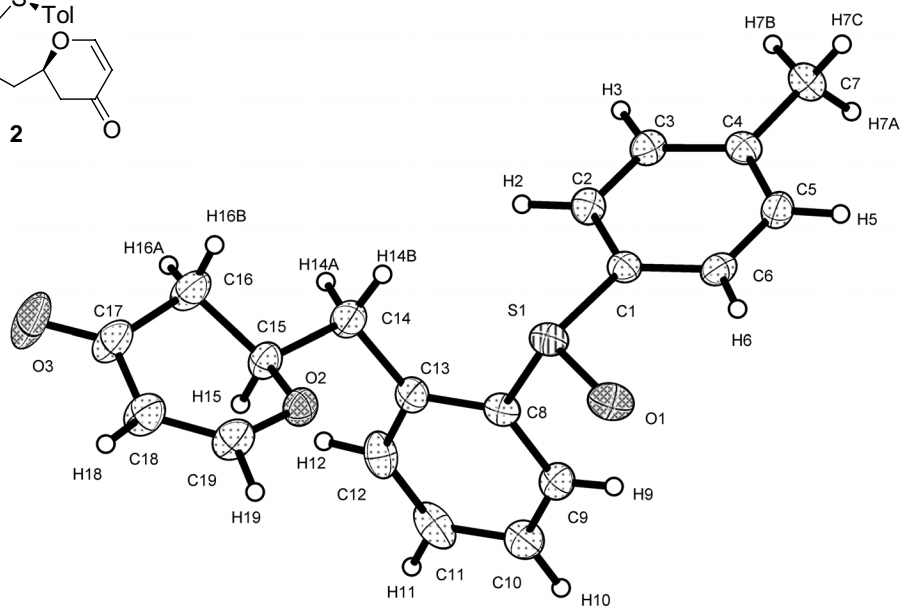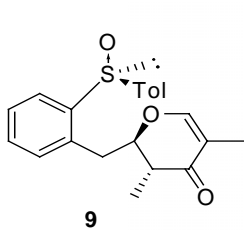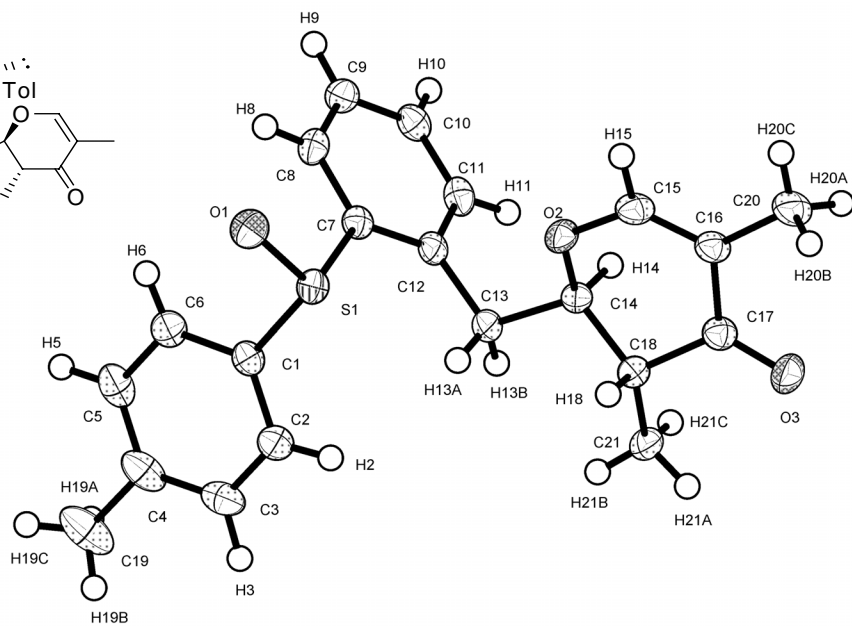

Configurational assignment of **20**:

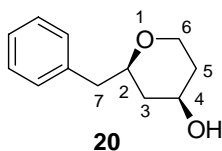

Representative  $^1\text{H}$ -NMR signals from **20**:

| Entry | proton          | $\delta$ (ppm) | Multiplicity | $J$ (Hz)       |
|-------|-----------------|----------------|--------------|----------------|
| 1     | H <sub>6</sub>  | 3.94           | ddd          | 11.9, 4.7, 1.7 |
| 2     | H <sub>4</sub>  | 3.65           | tt           | 10.9, 4.5      |
| 3     | H <sub>2</sub>  | 3.41           | dtd          | 11.1, 6.4, 1.9 |
| 4     | H <sub>6'</sub> | 3.29           | dt           | 12.4, 2.1      |
| 5     | H <sub>7</sub>  | 2.87           | dd           | 13.6, 6.6      |
| 6     | H <sub>7'</sub> | 2.62           | dd           | 13.7, 7.0      |

*Trans* coupling constants were observed for H<sub>2</sub> (11.1 Hz) and H<sub>4</sub> (10.9 Hz), showing their axial arrangement in alcohol **20**. Therefore, the compound presents (2*R*,4*R*) configuration.

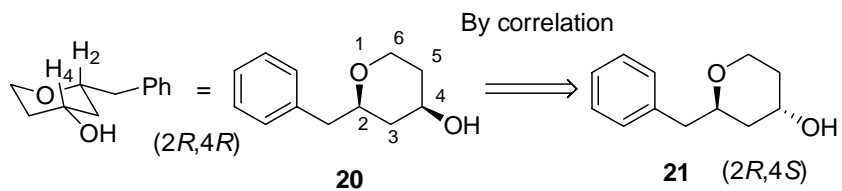



Configurational assignment of **22**:

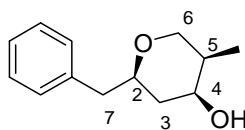

**22**

Representative  $^1\text{H}$ -NMR signals from **22**:

| Entry | proton                  | $\delta$ (ppm) | Multiplicity | $J$ (Hz)            |
|-------|-------------------------|----------------|--------------|---------------------|
| 1     | $\text{H}_{4\text{ax}}$ | 3.79           | dt           | 11.3, 5.0           |
| 2     | $\text{H}_6$            | 3.72           | dd           | 11.5, 1.6           |
| 3     | $\text{H}_{6'}$         | 3.42           | dd           | 11.5, 2.2           |
| 4     | $\text{H}_2$            | 3.42           | dtd          | 13.2, 6.6, 2.2      |
| 5     | $\text{H}_7$            | 2.87           | dd           | 13.7, 6.3           |
| 6     | $\text{H}_7$            | 2.64           | dd           | 13.7, 6.6           |
| 8     | $\text{H}_{3\text{ec}}$ | 1.56           | dddd         | 12.6, 4.7, 2.2, 0.9 |
| 9     | $\text{H}_{3\text{ax}}$ | 1.36           | q            | 11.0                |
| 10    | $\text{CH}_3$           | 0.97           | d            | 6.9                 |

$\text{H}_6$  and  $\text{H}_{6'}$  protons appear as double doublets, with a high coupling constant (11.5 Hz), related to their *geminal* relationship, and low coupling constants with  $\text{H}_5$  (1.6, 2.2 Hz, respectively), indicating the equatorial position of this proton. Then, methyl group adopts the axial arrangement. On the other hand, both  $\text{H}_4$  and  $\text{H}_2$  present a high constant, indicating that both protons are in axial position. Therefore, compound **22** presents (2*R*,4*S*,5*R*) configuration.

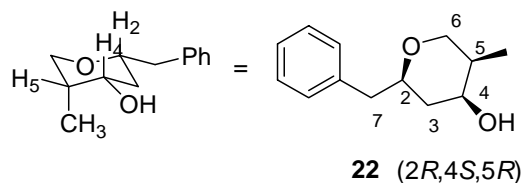

Supplement: Supplementary file 1 [file 4762543]
